# Supplementary material for: Large genome-wide association study identifies three novel risk variants for restless legs syndrome
Source: PubMed Central journal article supplement (PMC7689502; doi:10.1038/s42003-020-01430-1), 2020-11-25
Supplement: 42003_2020_1430_MOESM3_ESM.pdf [file 42003_2020_1430_MOESM3_ESM.pdf]

## Description of Additional Supplementary Files

**File Name:** Supplementary Data 1 – 12

### Description:

- **Supplementary Data 1:** Displaying association results for the five novel RLS-associated variants identified in the discovery meta-analysis
- **Supplementary Data 2:** Displaying association results for previously identified RLS-associated variants as well as association results for these variants in the discovery cohort from the present study as well as a meta-analysis of the results from the discovery cohort and previous results
- **Supplementary Data 3:** Displaying novel RLS-associated variants identified in the discovery meta-analysis as well as associations with known RLS-associated variants
- **Supplementary Data 4:** Displaying genotype tissue expression for RLS-associated variants
- **Supplementary Data 5:** Displaying results from COJO conditional analysis of GTEx expression data for all variants with prior probability of P value  $< 3.3e-6$  and degree of linkage disequilibrium  $\geq 0.3$  with the lead RLS-associated variants. analysis and therefore set Bonferroni threshold to P value  $< 2.01e-04$
- **Supplementary Data 6:** COJO conditional analysis of GTEx expression data for all variants with prior probability of P  $< 3.3e-6$  and  $r^2 \geq 0.3$  with the RLS lead variants. We performed 249 tests (220+29) for COJO conditional analysis and therefore set the Bonferroni threshold to P  $< 2.01e-04$  for different signals.
- **Supplementary Data 7:** Displaying AUC calculation for RLS cases in UK Biobank using: phenotype  $\sim$  rls\_prs + Sex\*poly(Yob,3) + PC1:40.
- **Supplementary Data 8:** Displaying results from association analysis between RLS-polygenic risk score and several binary health-related traits
- **Supplementary Data 9:** Displaying results from association analysis between RLS-polygenic risk score and several quantitative health-related traits
- **Supplementary Data 10:** Displaying measures of genetic correlations using LDSC gc method for the top ranked binary traits from the RLS-polygenic risk score analysis

- **Supplementary Data 11:** Displaying measure of genetic correlation using LDSC gc method for the top ranked quantitative traits from PRS analysis.
- **Supplementary Data 12:** Displaying top gene-set terms/pathways from MAGMA gene-set enrichment analysis using Molecular signature database resource.
